# Supplementary material for: Organic Consumer Choices for Nutrient Labels on Dried Strawberries among Different Health Attitude Segments in Norway, Romania, and Turkey
Source: PubMed Central journal article supplement (PMC6950596; doi:10.3390/nu11122951), 2019-12-04
Supplement: nutrients-11-02951-s001.pdf [file nutrients-11-02951-s001.pdf]

Figure S1: An example of choice set (English translation).

Which package of dried strawberries would you choose?

7.00€ **DRIED STRAWBERRIES**  
Dehydrated by air drying  
Produced in the EU 40 g

7.00€ **DRIED STRAWBERRIES**  
Dehydrated by microwave drying  
Produced in Norway 40 g

None of these
